# Supplementary material
Source: publisher figshare collection journal article supplement (https://acs.figshare.com/ndownloader/files/18207149)
Supplement: Supplementary file 1 [file 18207149]

## SUPPORTING INFORMATION

### Bioinspired Smart Anticorrosive Coatings with an Emergency-Response Closing (ERC) Function

Jiheng Ding<sup>1, 2</sup>, Hongran Zhao<sup>1, 3\*</sup>, Zhenzong Shao<sup>1</sup>, and Haibin Yu<sup>1,3\*</sup>

1. *Key Laboratory of Marine Materials and Related Technologies, Zhejiang Key Laboratory of Marine Materials and Protective Technologies, Ningbo Institute of Materials Technology and Engineering, Chinese Academy of Sciences, Ningbo 315201, P. R. China.*
2. *University of Chinese Academy of Science, P. R.China*
3. *Corresponding Author: [zhaohongran@nimte.ac.cn](mailto:zhaohongran@nimte.ac.cn) (Hongran Zhao). [haibinyu@nimte.ac.cn](mailto:haibinyu@nimte.ac.cn) (Haibin Yu).*

**Table S1.** Elemental composition (wt.%) of the Q235 CS electrodes.

| <i>Cr</i> | <i>Si</i> | <i>Mn</i> | <i>O</i> | <i>B</i> | <i>C</i> | <i>Fe</i> |
|-----------|-----------|-----------|----------|----------|----------|-----------|
| 0.02      | 0.23      | 0.42      | 0.46     | 0.55     | 5.62     | Bal       |

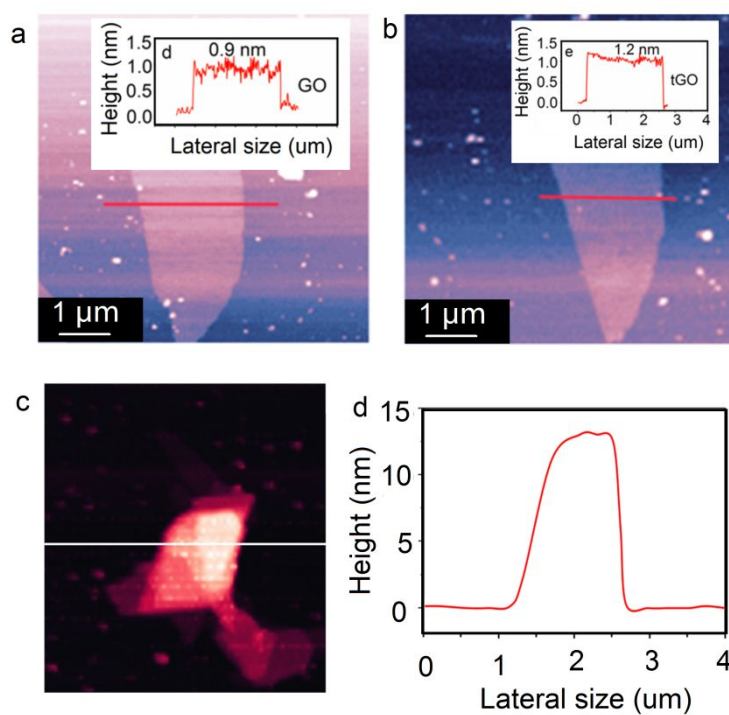

**Figure S1.** AFM images of GO (a), tGO (b) and Fe-tGO (c and d).

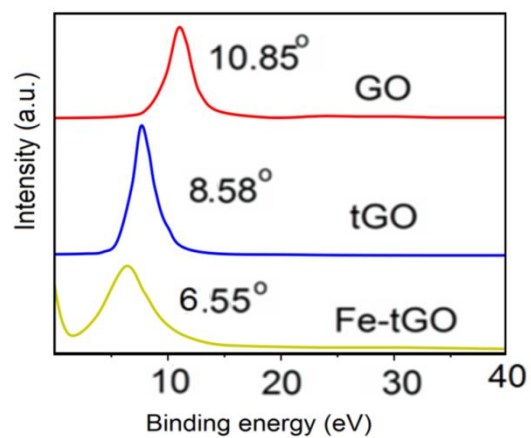

**Figure S2.** XRD spectra of GO, tGO, and Fe-tGO samples, respectively.

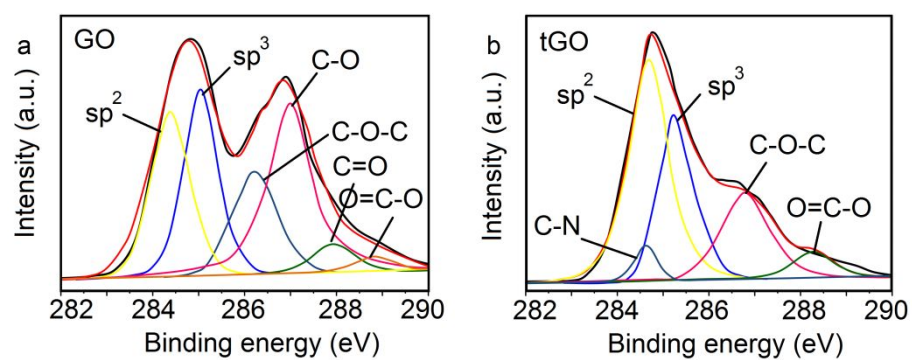

**Figure S3.** The high-resolution C 1s spectra of GO (a) and tGO (b).

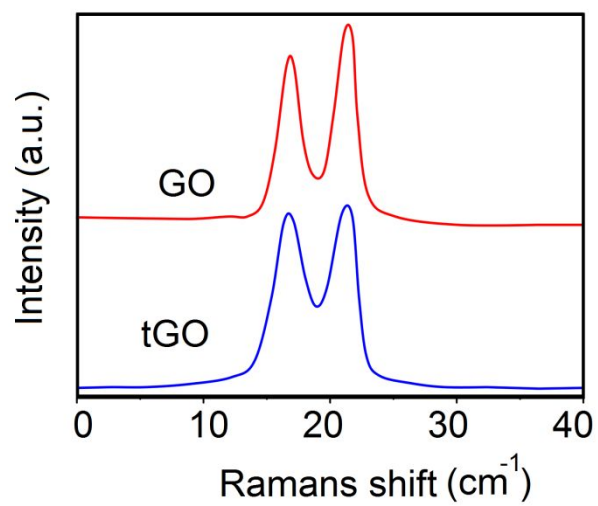

**Figure S4.** Raman spectra of GO and tGO.

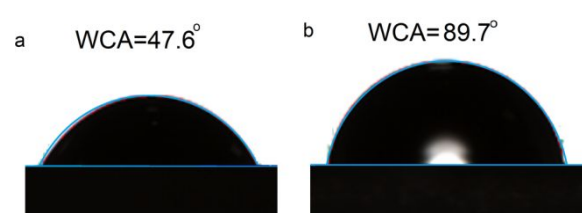

**Figure S5.** The WCAs on the EP were  $47.6 \pm 1.9^\circ$  (a), smaller than that on tGO/EP which was  $89.7 \pm 2.4^\circ$  (b) at room temperature ( $25^\circ \text{C}$ ).

**Table 2.** Comparison with other similar reported work.

| S. no.   | Nanofiller polymer coating                                                              | Thickness ( $\mu\text{m}$ ) | Immersion time | Impedance ( $\text{ohm cm}^2$ )  | Ref.                |
|----------|-----------------------------------------------------------------------------------------|-----------------------------|----------------|----------------------------------|---------------------|
| <b>1</b> | <b>tGO epoxy</b>                                                                        | <b>20</b>                   | <b>60 days</b> | <b><math>\sim 10^{10}</math></b> | <b>Current work</b> |
| 2        | Aniline trimer (AT) functionalized graphene sheets (SAT-G) epoxy                        | 50                          | 75 days        | $\sim 10^8$                      | 1                   |
| 3        | Noncovalently functionalized graphene with poly(o-phenylenediamine) nanoparticles epoxy | 50                          | 60 days        | $\sim 10^{10}$                   | 2                   |
| 4        | Graphene oxide (GO) epoxy                                                               | 20                          | 15 days        | $\sim 10^6$                      | 3                   |
| 5        | Noncovalently functionalized graphene with poly(2-butylaniline) (P2BA) epoxy            | 20                          | 80 days        | $\sim 10^8$                      | 4                   |
| 6        | Functionalized graphene oxide (rGO) with (3-aminopropyl)-triethoxysilane (APTES) PVB    | 97                          | 7 days         | $\sim 10^8$                      | 5                   |
| 7        | Functionalized graphene oxide (rGO) with $\text{SiO}_2$ (APTES) PVB                     | 83                          | 7 days         | $\sim 10^8$                      | 6                   |
| 8        | Fluorographene (FG) epoxy                                                               | 58                          | 25 days        | $\sim 10^9$                      | 7                   |

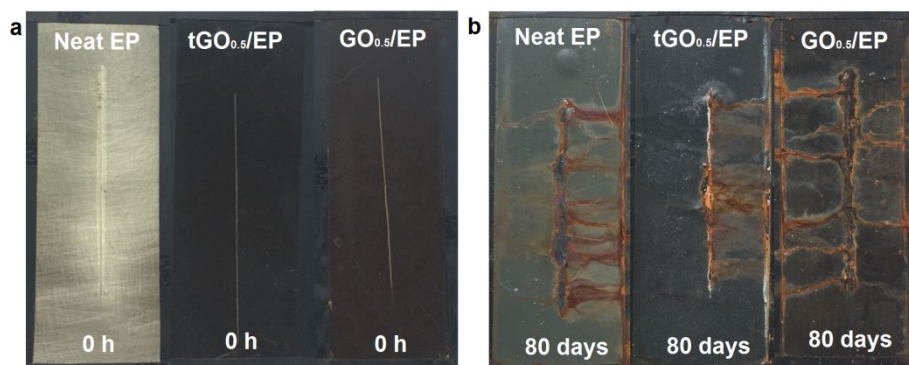

**Figure S6.** Digital photos of samples after neutral salt spray test before (a) and after (b) 80 days exposure.



Reference:

1. Ye, Y.; Zhang, D.; Liu, T.; Liu, Z.; Pu, J.; Liu, W.; Zhao, H.; Li, X.; Wang, L. Superior Corrosion Resistance and Self-Healable Epoxy Coating Pigmented with Silanized Trianiline-Intercalated Graphene. *Carbon* **2019**, *142*, 164-176.
2. Cui, M.; Ren, S.; Pu, J.; Wang, Y.; Zhao, H.; Wang, L. Poly(o-Phenylenediamine) Modified Graphene toward the Reinforcement in Corrosion Protection of Epoxy Coatings. *Corros. Sci.* **2019**, *159*, 108131-108143.
3. Jiang, F.; Zhao, W.; Wu, Y.; Dong, J.; Zhou, K.; Lu, M.; Pu, J. Anti-Corrosion Behaviors of Epoxy Composite Coatings Enhanced via Graphene Oxide with Different Aspect Ratios. *Prog. Org. Coat.* **2019**, *127*, 70-29.
4. Chen, C.; Qiu, S.; Cui, M.; Qin, S.; Yan, G.; Zhao, H.; Wang, L.; Xue, Q. Achieving High Performance Corrosion and Wear Resistant Epoxy Coatings via Incorporation of Noncovalent Functionalized Graphene. *Carbon* **2017**, *114*, 356-366.
5. Sun, W.; Wang, L.; Wu, T.; Wang, M.; Yang, Z.; Pan, Y.; Liu, G. Inhibiting the Corrosion-Promotion Activity of Graphene. *Chem. Mater.* **2015**, *27*, 2367-2373.
6. Sun, W.; Wang, L.; Wu, T.; Pan, Y.; Liu, G. Inhibited Corrosion-Promotion Activity of Graphene Encapsulated in Nanosized Silicon Oxide. *J. Mater. Chem. A* **2015**, *3*, 16843-16848.
7. Yang, Z.; Wang, L.; Sun, W.; Li, S.; Zhu, T.; Liu, W.; Liu, G. Superhydrophobic Epoxy Coating Modified by Fluorographene Used for Anti-Corrosion and Self-Cleaning. *Appl. Surf. sci.* **2017**, *401*, 146-155.
